# Supplementary material
Source: PubMed Central journal article supplement (PMC5949068)
Supplement: NIHMS964473-supplement-Supplemental.pdf [file NIHMS964473-supplement-Supplemental.pdf]

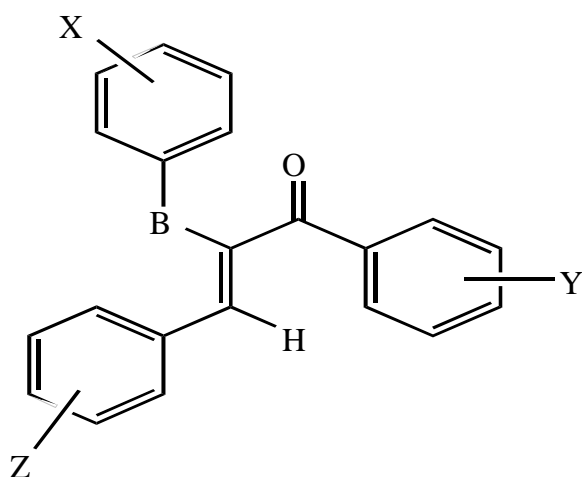

The parent structure of ONO4series of compounds

**Supplemental Table 1:** The structural variations of the six lead compounds from the parent structure are given below in the tabulated form

| COMPOUND  | x                   | B                 | Y                        | Z                        |
|-----------|---------------------|-------------------|--------------------------|--------------------------|
| ON O4120  | 4-F                 | SO <sub>2</sub>   | 4-CH <sub>3</sub> O      | 4-Br                     |
| ON O4140  | 4-Cl                | SO <sub>2</sub>   | 4-CH <sub>3</sub> O      | 4-Cl                     |
| ON O42690 | 4-CH <sub>3</sub>   | SO <sub>2</sub>   | 4-Br                     | 3-Indolyl                |
| ON O43880 | 2,4-Cl <sub>2</sub> | CH <sub>2</sub>   | 4-Cl                     | 3-indole                 |
| ON O43950 | 4-Br                | CH <sub>2</sub> S | 2,3,4,5,6-F <sub>5</sub> | 3-OH , 4-NO <sub>2</sub> |
| ON O44000 | 2-F                 | CH <sub>2</sub> S | 4-Cl                     | 2-OCH <sub>3</sub>       |

**Supplemental Table 2: IC<sub>50</sub> and GI<sub>50</sub> values of six lead compounds in three different cancer lines**

| SNO. | COMPOUNDS       | IC <sub>50</sub> (μM)<br>(luciferase<br>renaturation<br>assay | GI <sub>50</sub> (μM)<br><br>In BT-474<br>Cancer cell line | GI <sub>50</sub> (μM)<br><br>In K562 Cancer<br>cell line | GI <sub>50</sub> (μM)<br><br>In DU-145<br>Cancer cell<br>line |
|------|-----------------|---------------------------------------------------------------|------------------------------------------------------------|----------------------------------------------------------|---------------------------------------------------------------|
| 1.   | <b>ONO4120</b>  | 4.0                                                           | 4.0                                                        | 5.0                                                      | 5.0                                                           |
| 2.   | <b>ONO4140</b>  | 2.5                                                           | 4.4                                                        | 5.0                                                      | 5.0                                                           |
| 3    | <b>ONO42690</b> | 1.1                                                           | 9.6                                                        | 10.0                                                     | 25.0                                                          |
| 4.   | <b>ONO43880</b> | 3.8                                                           | 5.5                                                        | 10.0                                                     | 25.0                                                          |
| 5.   | <b>ONO43950</b> | 6.0                                                           | 6.0                                                        | 1.0-10.0                                                 | 25.0                                                          |
| 6.   | <b>ONO44000</b> | 5.0                                                           | 15.0                                                       | 1.0-10.0                                                 | 10.0-25.0                                                     |
